# Supplementary material
Source: PubMed Central journal article supplement (PMC4380502)

Supplemental Table 1. *Healthy Controls (n = 22); Neural Responses to Facial Emotion Identification*

| <b>Contrast/Lobe</b>                    | <b>Talairach Coordinates</b> |           |          |          |              | <b>mm<sup>3</sup></b> |
|-----------------------------------------|------------------------------|-----------|----------|----------|--------------|-----------------------|
|                                         | <b>BA</b>                    | <b>x</b>  | <b>y</b> | <b>z</b> | <b>Z</b>     |                       |
| <u>Frontal</u>                          |                              |           |          |          |              |                       |
| Inferior Frontal                        | 46/10                        | -38       | 35       | 10       | 4.39         | 7952                  |
| Middle/Inferior Frontal/Insula          | 46/45/9/13                   | -32       | 14       | 27       | 4.37         | 1240                  |
| Superior Frontal                        | 46/45/13<br>10               | 34<br>-17 | 12<br>51 | 18<br>18 | 3.89<br>3.76 | 3112<br>216           |
| <u>Parietal</u>                         |                              |           |          |          |              |                       |
| Inferior Parietal                       | 39/40                        | 22        | -50      | 22       | 3.78         | 296                   |
|                                         | 39/40                        | -22       | -34      | 28       | 3.33         | 248                   |
| Precuneus                               | 7                            | -17       | -56      | 37       | 3.55         | 320                   |
| <u>Temporal</u>                         |                              |           |          |          |              |                       |
| Parahippocampal                         | 30                           | -10       | -36      | 3        | 4.10         | 2704                  |
|                                         | 19/30                        | -22       | -48      | -1       | 3.86         | 200                   |
|                                         | 19                           | -34       | -46      | 1        | 3.74         | 720                   |
| <u>Subcortical</u>                      |                              |           |          |          |              |                       |
| Caudate Body                            |                              | 6         | -1       | 14       | 3.84         | 528                   |
| Putamen/Globus Pallidus/<br>Hippocampus |                              | 20        | -17      | -1       | 4.72         | 3592                  |
|                                         |                              | -22       | -19      | -3       | 4.39         | 2072                  |
| Pulvinar                                |                              | 12        | -29      | 16       | 3.85         | 336                   |
| Medial Dorsal Nucleus                   |                              | -8        | -11      | 13       | 4.25         | 728                   |
| Pons/Raphe                              |                              | -1        | -32      | -25      | 3.73         | 1072                  |

*Note.* BA = Brodmann's area; x, y, z = Talairach coordinates of regions in which significant effects were demonstrated.

Supplemental Table 2.

*MDD group (n = 24); Neural Responses to Facial Emotion Identification*

| <b>Contrast/Lobe</b>                | <b>Talairach Coordinates</b> |          |          |          |          | <b>mm<sup>3</sup></b> |
|-------------------------------------|------------------------------|----------|----------|----------|----------|-----------------------|
|                                     | <b>BA</b>                    | <b>x</b> | <b>y</b> | <b>z</b> | <b>Z</b> |                       |
| <u>Frontal</u>                      |                              |          |          |          |          |                       |
| Inferior Frontal/Insula             | 47/13                        | -32      | 18       | 1        | 4.61     | 3552                  |
| Superior Frontal                    | 9                            | -15      | 53       | 24       | 3.62     | 192                   |
| Precentral                          | 4                            | 33       | -17      | 48       | 4.56     | 2376                  |
| Middle Frontal/Pre/Postcentral      | 3/4/5/<br>6/8/9              | 10       | -38      | 63       | 6.03     | 129512                |
| Anterior Cingulate                  | 24/32                        | -13      | 22       | 20       | 3.42     | 320                   |
| Ventral Anterior Cingulate          | 24                           | -13      | -5       | 10       | 3.64     | 448                   |
| <u>Parietal</u>                     |                              |          |          |          |          |                       |
| Inferior Parietal/Superior Temporal | 39/40                        | 43       | -52      | 20       | 3.81     | 472                   |
|                                     | 39/40                        | -43      | -50      | 45       | 4.02     | 208                   |
|                                     | 39/40                        | -27      | -52      | 23       | 5.36     | 6024                  |
| Precuneus                           | 7                            | 15       | -58      | 46       | 3.45     | 208                   |
| <u>Temporal</u>                     |                              |          |          |          |          |                       |
| Middle Temporal                     | 22/19                        | -40      | -58      | 16       | 3.77     | 1192                  |
| Middle/Superior Temporal            | 21/22                        | 45       | -44      | 1        | 4.12     | 1480                  |
| Parahippocampal/ Amygdala           |                              | -25      | -11      | -13      | 3.57     | 240                   |
| <u>Occipital</u>                    |                              |          |          |          |          |                       |
| Lingual                             | 18                           | -32      | -77      | 3        | 3.46     | 544                   |
|                                     | 17                           | 15       | -81      | -1       | 3.76     | 160                   |
| <u>Subcortical</u>                  |                              |          |          |          |          |                       |
| Pulvinar/Medial Dorsal Nucleus      |                              | -3       | -23      | 9        | 3.69     | 640                   |
| Mammillary Body/ Substantia Nigra   |                              | 3        | -7       | -6       | 3.74     | 632                   |
| Cerebellum                          |                              | -18      | -73      | -16      | 3.57     | 168                   |
|                                     |                              | -18      | -79      | -29      | 3.75     | 176                   |

*Note.* BA = Brodmann's area; x, y, z = coordinates of regions in which significant effects were demonstrated.

Supplemental Table 3. *Accuracy and Reaction Time on the Facial Emotion Perception Test (FEPT) for Healthy Control (HC) and Major Depressive Disorder (MDD) Groups*

| Variable           | HC       |           | MDD      |           | <i>t</i> (44)      | <i>p</i> | <i>d</i> |
|--------------------|----------|-----------|----------|-----------|--------------------|----------|----------|
|                    | <i>M</i> | <i>SD</i> | <i>M</i> | <i>SD</i> |                    |          |          |
| Overall            |          |           |          |           |                    |          |          |
| % Accuracy Faces   | 89.8     | 4.3       | 86.6     | 7.0       | 1.86               | .04      | 0.75     |
| RT Faces           | 1172.9   | 107.8     | 1154.8   | 155.6     | 0.46               | .33      | 0.17     |
| % Accuracy Animals | 87.9     | 10.2      | 84.5     | 10.3      | 1.10               | .14      | 0.33     |
| RT Animals         | 1186.3   | 135.3     | 1155.2   | 142.8     | 0.76               | .23      | 0.23     |
| Happy              |          |           |          |           |                    |          |          |
| % Accuracy         | 98.1     | 2.6       | 95.7     | 4.8       | 2.07               | .02      | .90      |
| RT                 | 916.8    | 104.1     | 1004.1   | 204.0     | -1.85 <sup>a</sup> | .04      | -0.84    |
| Sad                |          |           |          |           |                    |          |          |
| % Accuracy         | 81.5     | 11.9      | 78.0     | 15.8      | 0.83               | .21      | 0.21     |
| RT                 | 1205.2   | 166.2     | 1230.8   | 227.2     | -0.43              | .33      | -0.15    |
| Angry              |          |           |          |           |                    |          |          |
| % Accuracy         | 82.8     | 9.0       | 82.9     | 18.5      | -0.01              | .50      | -0.01    |
| RT                 | 1251.8   | 187.3     | 1144.9   | 178.0     | 1.99               | .03      | 0.57     |
| Fearful            |          |           |          |           |                    |          |          |
| % Accuracy         | 80.4     | 12.3      | 74.0     | 16.6      | 1.57               | .06      | 0.55     |
| RT                 | 1391.5   | 186.6     | 1320.5   | 232.5     | 1.14               | .13      | 0.38     |

*Note.* RT = Reaction Time for correct responses. <sup>a</sup>Degrees of freedom = 34.85 due to unequal error variance,  $t(34.85) = -1.85$ ,  $p = .04$ .

Supplemental Figure 1. Relationships amongst Left and Right Inferior Frontal Gyrus and Right IFG/Left IFG ratio with FEP performance in MDD and HC groups. The figure illustrates correlations amongst left and right inferior frontal gyrus (IFG), right IFG/left IFG ratio score, and FEPT task performance in the MDD group, with correlations for the HC group presented in parentheses. Significant correlations are marked with an asterisk; trend-level correlation marked with a caret.

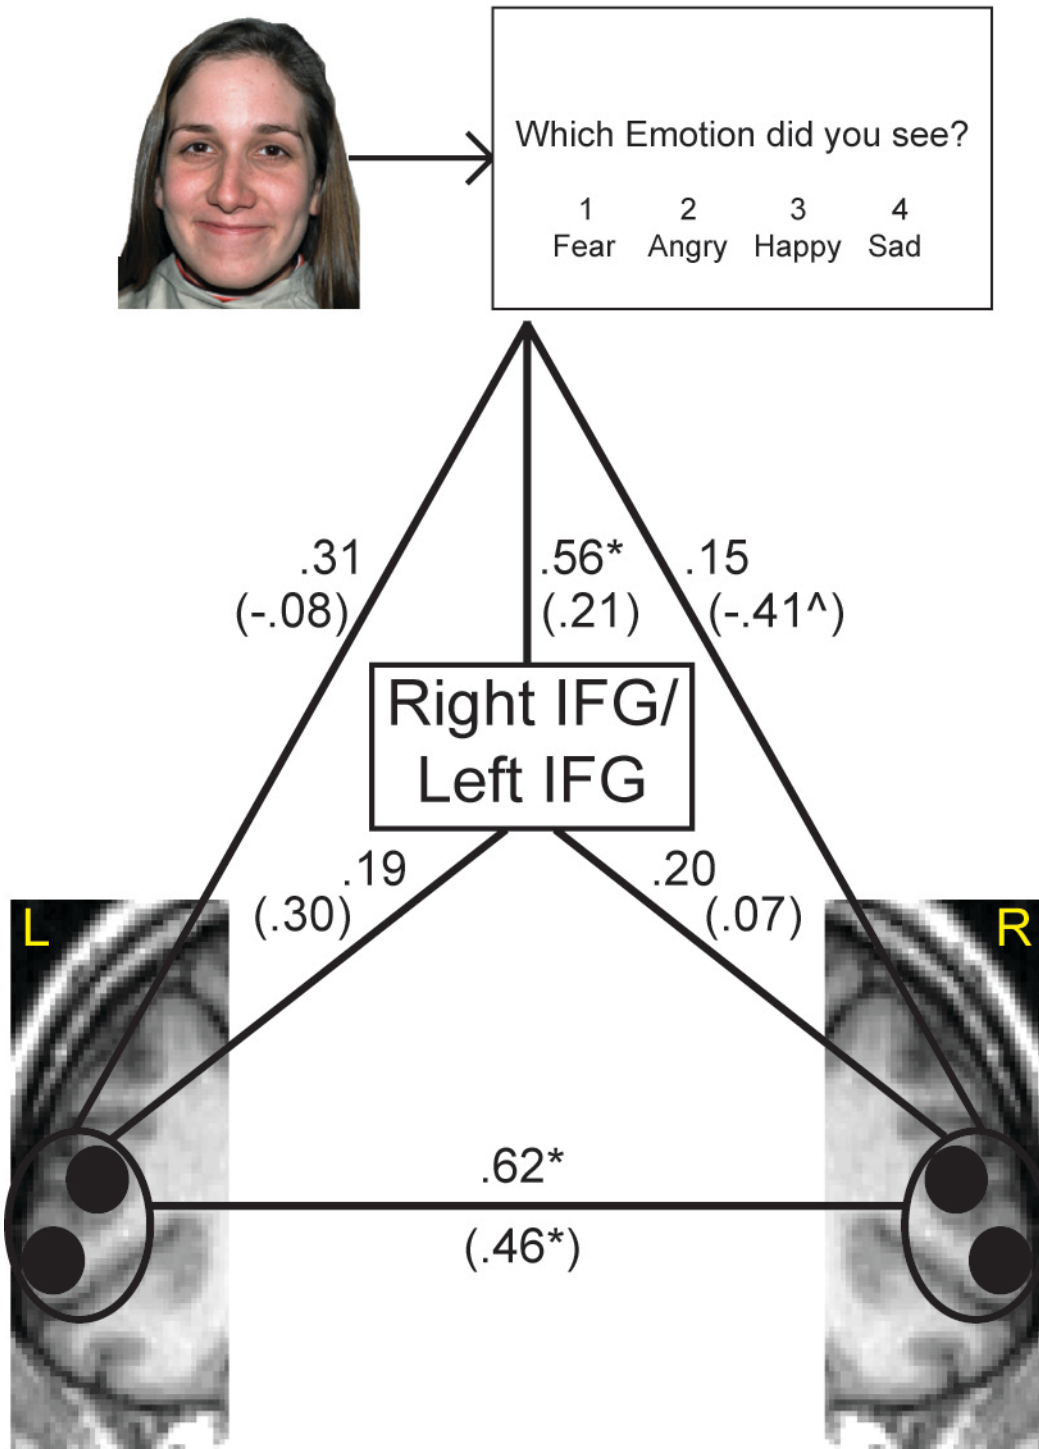

Supplement: NIHMS671558-supplement-supplement_1.pdf [file NIHMS671558-supplement-supplement_1.pdf]
